## 1                    **Screening by deep sequencing reveals mediators of microRNA tailing in *C. elegans***

2    Karl-Frédéric Vieux\*<sup>1</sup>, Katherine Prothro\*<sup>1,4</sup>, Leanne H. Kelley<sup>2</sup>, Eleanor M. Maine<sup>2</sup>, Isana Veksler-  
3    Lublinsky<sup>3</sup>, Katherine McJunkin<sup>1,5</sup>

4    <sup>1</sup>National Institutes of Diabetes and Digestive and Kidney Diseases Intramural Research Program,  
5    Bethesda, MD 20815 USA

6    <sup>2</sup>Department of Biology, Syracuse University, Syracuse, NY 13244 USA

7    <sup>3</sup>Ben Gurion University of the Negev, Beer Sheva 8410501 Israel

8    <sup>4</sup>Present address: Stanford University School of Medicine, Stanford, CA 94305 USA

9    <sup>5</sup>To whom correspondence should be addressed: Tel: +1-301-496-6991; Fax: +1-301-496-5239 ; Email:  
10    mcjunkin@nih.gov

11    \*The authors wish it to be known that, in their opinion, the first two authors should be regarded as joint  
12    First Authors.

13

### 14    **Abstract**

15    microRNAs are frequently modified by addition of untemplated nucleotides to the 3' end, but the role of  
16    this tailing is often unclear. Here we characterize the prevalence and functional consequences of microRNA  
17    tailing *in vivo*, using *C. elegans*. MicroRNA tailing in *C. elegans* consists mostly of mono-uridylation of  
18    mature microRNA species, with rarer mono-adenylation which is likely added to microRNA precursors.  
19    Through a targeted RNAi screen, we discover that the TUT4/TUT7 gene family member CID-1/CDE-  
20    1/PUP-1 is required for uridylation, whereas the GLD2 gene family member F31C3.2 – here named GLD-  
21    2-related 2 (GLDR-2) – is required for adenylation. Thus, the TUT4/TUT7 and GLD2 gene families have  
22    broadly conserved roles in miRNA modification. We specifically examine the role of tailing in microRNA  
23    turnover. We determine half-lives of microRNAs after acute inactivation of microRNA biogenesis,  
24    revealing that half-lives are generally long (median=20.7h), as observed in other systems. Although we  
25    observe that the proportion of tailed species increases over time after biogenesis, disrupting tailing does not  
26    alter microRNA decay. Thus, tailing is not a global regulator of decay in *C. elegans*. Nonetheless, by  
27    identifying the responsible enzymes, this study lays the groundwork to explore whether tailing plays more  
28    specialized context- or miRNA-specific regulatory roles.

29

### 30    **Introduction**

31            microRNAs (miRNAs) are small non-coding RNAs that bind Argonaute (Ago) proteins to form  
32    the miRNA-induced silencing complex (miRISC), which represses complementary target mRNAs (1).  
33    miRNA-target interactions are important in sculpting gene regulation for normal physiology (2).

1 Canonical miRNAs are derived from longer primary transcripts (pri-miRNAs) from which a  
2 hairpin-like secondary structure is recognized and excised by the Microprocessor complex, made up of the  
3 ribonuclease Droscha and its protein cofactor DGCR8/Pasha (3). This excised hairpin, known as the miRNA  
4 precursor (or pre-miRNA), is exported to the cytoplasm where its loop is cleaved by Dicer (3). One strand  
5 of the resulting miRNA duplex (the “guide” strand) is then preferentially loaded into Ago, and the passenger  
6 strand (“star” strand) is degraded (3).

7 In contrast to biogenesis, the process of miRNA turnover is poorly understood, despite turnover’s  
8 equivalent importance in determining miRNA abundance. In general, miRNA half-lives are long, on the  
9 order of ~20h, with some miRNAs exhibiting characteristically shorter half-lives (4–8). Certain  
10 physiological signals and developmental contexts can accelerate miRNA turnover by poorly understood  
11 mechanisms, such as neuronal activity which globally destabilizes miRNAs in the retina (9).

12 Untemplated nucleotide additions to the 3' end (“tailing”) can regulate both biogenesis and decay  
13 of miRNAs through multiple mechanisms. These modifications are carried out by a class of enzymes known  
14 as terminal nucleotidyl transferases (TENTs), which also have other roles in regulating mRNAs and viral  
15 genomes (10, 11).

16 The most well-understood examples of tailing regulating miRNAs involve uridylation of miRNA  
17 precursors. This type of tailing generally impacts atypical precursors that lack the canonical 2-nt single-  
18 stranded 3' overhang which is generated by Microprocessor cleavage and recognized by Dicer (12). The  
19 type of uridylation and its consequence depends on the length of the 3' overhang, where 1-nt overhangs are  
20 mono-uridylated to favor biogenesis and further recessed ends are oligo-uridylated resulting in decay of the  
21 precursor (12). Precursor uridylation can also regulate biogenesis by shifting the site of Dicer cleavage,  
22 which can result in alternative miRNA guide strand selection (arm-switching) (13). Oligo-uridylation and  
23 decay of the *let-7* precursor are induced even in the context of a canonical 2-nt 3' overhang by binding of  
24 the RNA-binding protein LIN-28 (14, 15). Finally, non-canonical Microprocessor-independent miRNA  
25 precursors derived from short introns (mirtron precursors) are also highly uridylated, inhibiting their  
26 biogenesis in *Drosophila* (16, 17).

27 Tailing can also occur on mature miRNAs, again with a wide variety of outcomes. During  
28 embryonic development of *Drosophila*, fish, and mice, terminal adenylation of maternally-contributed  
29 miRNAs induces sequence-non-specific miRNA decay at the maternal to zygotic transition (18). In contrast  
30 to the clearance of adenylated maternally-contributed miRNAs, terminal adenylation of mature miRNAs is  
31 stabilizing and activating for miR-122 and a subset of other miRNAs (19–21).

1 Through a process known as target-directed miRNA degradation (TDMD), target RNAs with  
2 extensive complementarity cause the 3' end of miRNAs to be tailed and trimmed, concomitant with miRNA  
3 destabilization (22–31). While tailing was initially assumed to be causative of miRNA decay in this context,  
4 recent studies demonstrate examples in which tailing is dispensable for TDMD, suggesting that 3' tailing  
5 may be a symptom of miRNA 3' end display rather than an upstream regulatory event in TDMD (31–35).

6 Beyond effects on stability, 3' miRNA tailing can even alter target repertoire (36). Overall, tailing  
7 of miRNA precursors and mature miRNAs has a wide range of regulatory consequences. How tailing is  
8 coupled to these various outcomes in a miRNA- and context-dependent manner is not understood.

9 In this work, we set out to examine the role of tailing in miRNA turnover in a model organism *in*  
10 *vivo*. We first use deep sequencing and meta-analysis of published data to characterize miRNA tailing in  
11 *C. elegans*. We perform a candidate RNAi screen by deep sequencing to discover the enzymes responsible  
12 for tailing, demonstrating that terminal uridylyltransferase 4 (TUT4)/TUT7 ortholog caffeine induced death  
13 homolog 1 (CID-1) is required for U-tailing, and defective in germ line development 2 (GLD2) ortholog  
14 F31C3.2 – here named GLD-2-related 2 (GLDR-2) – is responsible for A-tailing. Finally, we use acute  
15 inactivation of miRNA biogenesis to measure miRNA turnover and show that, while U-tailing increases as  
16 miRNAs age, this is correlative not causative of miRNA turnover. Overall, this work importantly defines  
17 ancestral functions of TENT families that modify miRNAs, and – by defining the required enzymes – lays  
18 the groundwork for future studies to determine whether miRNA tailing in *C. elegans* may play context-  
19 dependent or miRNA-specific functions.

20

## 21 **Methods**

### 22 ***C. elegans* Maintenance and RNAi**

23 N2 (wild type) and SX1137 (*pash-1(mj100)*) worms were maintained at 15°C. For RNA samples, L1s  
24 were synchronized by alkaline hypochlorite lysis of gravid adults followed by hatching in M9 with 1mM  
25 cholesterol at 15°C for 48-72h. L1s were plated on NGM seeded with either OP50 or RNAi bacteria and  
26 maintained at 15°C until early day one of gravid adulthood (until just a few embryos were laid on the plate,  
27 ~76h after plating). (This time point was chosen because it achieved the best synchrony of SX1137, which  
28 tends to develop slightly asynchronously, even at permissive temperature.) This time point was harvested  
29 for N2 samples, SX1137 samples in the RNAi screen, and served as 0h in time courses involving SX1137.  
30 Additional SX1137 plates were shifted to 25°C, and samples were collected at the indicated time points  
31 after upshift for time courses on OP50 or RNAi. *pup-1(tm1021)*, *pup-2(tm4344)*, and *pup-1/-2(om129)*

1 mutations were maintained over a balancer chromosome at 15-20°C; RNA was isolated from homozygous  
2 F2 (M-Z-) 1-day adult hermaphrodites raised at 22°C.

3 RNAi plates were supplemented with 1µg/ml IPTG and 1µg/ml Carbenicillin (and poured no more than  
4 two weeks prior to use and stored at 4°C). The RNAi bacteria (HT115 expressing an RNAi vector) were  
5 prepared from single clones derived from the Ahringer library (Source Bioscience), the Vidal library  
6 (Source Bioscience), or custom RNAi vectors (Table S1). All previously-reported RNAi phenotypes were  
7 observed. Furthermore, a robust RNAi response in each sample was confirmed by the presence of abundant  
8 siRNAs mapping to the targeted locus.

### 9 **Small RNA Sequencing**

10 Total RNA was isolated by Trizol extraction. Spike-ins were added at a final concentration of 0.1pg/µl  
11 (OP50 samples) or 1pg/µl (RNAi samples) in 100ng/µl total RNA. See Table S2 for spike-in information.  
12 Libraries were prepared using the NEBNext Small RNA Library Prep set for Illumina with the following  
13 modifications. The first size selection was performed after the RT reaction by excising 65-75nt cDNA from  
14 an 8% denaturing acrylamide gel. PCR products were again size selected using a Pippin prep or 6% native  
15 acrylamide gel. Input RNA and final library sample quality were assessed using a Bioanalyzer. Equimolar  
16 amounts of each library were pooled; up to 24 indexed samples were pooled together for sequencing. For  
17 *pup-1(tm1021)*, *pup-2(tm4344)*, and *pup-1/-2(om129)* libraries, ~18-35 bp inserts were size-selected.  
18 Sequencing was performed on a NextSeq500 with a minimum of 10M single-end reads of minimum length  
19 50 nt.

### 20 **Data analysis**

21 Deep sequencing data were analyzed using the miTRATA web interface (37) after preprocessing the data  
22 using miTRATA's accompanying Python3-based preprocess.seq pipeline, installed on the NIH High  
23 Performance Computing Cluster in a dedicated miniconda environment. The mature *C. elegans* miRNAs  
24 from miRBase Release 22.1 (38) were used for miTRATA mapping. A custom C++ script reformatted the  
25 miTRATA output by consolidating read numbers for all reads meeting the following criteria into a tabular  
26 format: a tail:head ratio > 0.12 (16) and a tail length ≤ 3nt. These reformatted tailing data were further  
27 analyzed in RStudio. (One non-unique miRNA pair was of sufficient abundance to be included in tailing  
28 analysis – *mir-44/45-3p*; *mir-45-3p* was therefore culled from tabular data to avoid plotting this data twice.)  
29 To calculate reads per million, reads were normalized by the number of genome-mapping reads in the  
30 library (Table S3). The number of genome-mapping reads was determined using Bowtie (39) to align to the  
31 *C. elegans* genome (WS215), with the arguments -v 3 -f -B 1 -a --best --strata. Alignments were then filtered  
32 based on the length of the reads and the number of mismatches as follows: for sequence lengths 16-17, 18-

1 19, 20-24, or >24: zero, one, two, or three mismatches were allowed, respectively. Reads passing this  
2 threshold were considered “genome-mapping reads”. A custom bash/R pipeline was used to calculate  
3 trimming relative to canonical miRNA length from the miTRATA output files.

#### 4 **Statistical Analysis**

5 Fisher’s exact test for enrichment of tailing on 3p- or 5p-derived miRNAs was performed by counting  
6 miRNAs as above or below 1% tailed, and pooling these counts from three biological replicates to generate  
7 the contingency table, which was analyzed in GraphPad QuickCalcs. For the RNAi screen, GraphPad Prism  
8 v8.4.3 was used to perform one-way repeated measures ANOVA followed by Dunnett’s multiple  
9 comparison test. All RNAi conditions were compared to an empty vector sample, and this comparison was  
10 repeated for each empty vector sample. RNAi conditions that were significant in comparison to each empty  
11 vector sample are highlighted, with the least significant p-value reported. All miRNAs >50 RPM in all  
12 empty vector replicates were analyzed. To determine miRNA half-lives, for each miRNA with >50 RPM  
13 at 0h in both replicates, fold change at each time point relative to 0h was calculated using spike-in-  
14 normalized reads. GraphPad Prism v8.4.3 was used to fit a one phase decay non-linear regression model  
15 with the following constraints:  $Y_0=1$ , Plateau=0,  $K>0$ .

#### 16 **Phylogenetic analysis**

17 MEGA-X (40) was used to build phylogenetic trees of orthologous genes (to CID-1 and PUP-2, or to GLD-  
18 2 and F31C3.2) identified in WormBase ParaSite version WBPS15 (41). Orthologs from select non-  
19 nematode species were included as shown (Figures S7 and S9). The classification of nematode species into  
20 clades was downloaded from the same WormBase Parasite version WBPS15. Additional trees containing  
21 only *C. elegans* genes and common model organisms are shown in Figures 2 and 3. All alignments were  
22 generated using Clustal W (Multiple Alignment Gap Opening Penalty=10, Gap Extension Penalty=0.2,  
23 Negative Matrix Off, Delay Divergent Cutoff 30%). Maximum Likelihood method was used in MEGA-X,  
24 with no test of phylogeny, JTT model of substitution, uniform rates among sites, no subsetting (“use all  
25 sites”), NNI, automatic initial tree, and no branch swap filter.

#### 26 **Genome editing**

27 To generate the F31C3.2/*gldr-2(cdb187)* mutant, adult N2 hermaphrodites were injected with Cas9/gRNA  
28 RNPs to perform CRISPR. The gRNAs (gKFV05 and gKFV06) were designed to cleave within 300nt  
29 upstream and downstream of the F31C3.2/*gldr-2* ORF and ordered from IDT as Alt-R crRNAs. Both guides  
30 were used at 2 $\mu$ M in the injection mix. 500ng/ $\mu$ l of oKFV101 (Table S2) was used as a ssDNA oligo repair  
31 donor to produce a null deletion mutant. The final injection mix also included 2 $\mu$ M IDT Cas9 as well as

1 2 $\mu$ M of a *dpy-10* gRNA and 820nM of a *dpy-10* ssDNA oligo repair donor to generate a Dpy and Rol  
2 selection marker (42). See Supplemental Table S2 for gRNA, donor, and genotyping primer sequence  
3 details.

#### 4 **Transgenesis and TDMD sample preparation**

5 Constructs for TDMD triggers were generated using pCFJ420 (*myo-3p::gfp::h2b::tbb-2* terminator) as a  
6 backbone (43). For each trigger, sequences with high complementarity to the miRNAs of interest were  
7 ordered as complementary oligonucleotides, annealed at 12.5 $\mu$ M each in IDT duplex buffer, digested with  
8 BsmI, and cloned into the *tbb-2* 3'-UTR region of pCFJ420 (also digested with BsmI). See Supplemental  
9 Table S2 and Figure S15 for sequence details. The resulting plasmids (pKFV18, PKFV19, and pKFV20)  
10 were then injected into adult N2 hermaphrodite gonads to generate extra-chromosomal arrays. Injection  
11 mixes included pKFV18, pKFV19, pKFV20, or pCFJ420 (no-binding site negative control) along with the  
12 following selection markers: pDD282 (for Hygromycin resistance), pRF4 (for Rol phenotype) and mCherry  
13 expression plasmids (pGH8, pCFJC90, and pCFJ104) (44, 45). See Table S2 for injection mix details. Two  
14 to three stably transmitting arrays were isolated for each injected construct. To generate samples for deep  
15 sequencing, mixed populations were bleached in sodium hypochlorite and synchronized overnight in M9  
16 supplemented with 0.3mg/mL Hygromycin to select for worms carrying the extra-chromosomal array, then  
17 grown at 20°C on standard NGM seeded with OP50 until early day one of gravid adulthood. miRNA-  
18 Taqman assays (ThermoFisher Scientific) were performed according to manufacturer's instructions, using  
19 synthetic miRNAs to generate a standard curve for absolute quantification. Digital droplet PCR (ddPCR)  
20 was performed as a two-step RT-qPCR by first synthesizing oligo(dT) primed cDNA using the iScript™  
21 Select cDNA Synthesis Kit (Biorad), then running ddPCR via the standard EvaGreen program on a Biorad  
22 QX200 ddPCR system and analyzing in Quantasoft software (see Table S2 for primer sequences).

23

## 24 **Results**

### 25 **Patterns of miRNA tailing in *C. elegans* suggest different substrates than in flies and vertebrates**

26 To determine the nature and prevalence of miRNA tailing in *C. elegans*, we first cloned and deep  
27 sequenced small RNAs from wild type animals. To ensure reliable measurements of tailing, only miRNAs  
28 with greater than 50 reads per million were included in tailing analysis. To determine the level of  
29 background in our sequencing and computational pipeline, ten synthetic miRNAs (whose sequences are  
30 endogenous to plants and not present in *C. elegans* – Table S2) were spiked in to purified total RNA before  
31 preparation for deep sequencing. Although these RNA species were never present in the context of cellular

1 lysate, up to 1% tailing was detected; therefore, tailing levels measured below 1% (delineated by dashed  
2 line on all tailing plots) are low confidence and could arise due to PCR or sequencing errors.

3 Most tailing consisted of a single nucleotide addition (Figure 1A). Tails of two or more nucleotides  
4 were much rarer, and so we focused our analysis on further characterization of the single-nucleotide tails.  
5 Three replicates of adult animals showed strong correlation in proportions of tailing (Figure S1). Modest  
6 levels of miRNA tailing were observed, and tailing in *C. elegans* consisted primarily of uridylation with a  
7 much lower frequency of adenylation (Figure 1B, Table S4). This is in contrast to humans and flies, where  
8 both adenylation and uridylation are prevalent (46–49). In addition, a single miRNA, *mir-83-3p*, was highly  
9 cytidylated in all replicates (Figure 1B, Figure S1), a modification that is rarely observed in animals, but  
10 was recently reported as a frequent addition to plant miRNA precursors (50).

11 Either the mature miRNA species or the miRNA precursor may be the substrate of the observed  
12 tailing. If the vast majority of observed tailing events occur on miRNA precursors, then miRNAs derived  
13 from the 3' arm of the precursor hairpin (3p) would be expected to bear more terminal additions than those  
14 derived from the 5' arm of the hairpin (5p) since the 3' end of the 5p arm is not accessible for tailing prior  
15 to Dicer-mediated cleavage (Figure 1C). In vertebrates and *Drosophila*, miRNA precursors are the primary  
16 substrate of uridylation, though mature miRNAs can also be uridylated (33, 46–48, 51). In contrast, 3p and  
17 5p miRNAs displayed similar levels of uridylation in *C. elegans* (Figure 1D), indicating that U-tailing likely  
18 predominantly occurs on mature miRNA species. Untemplated adenylation generally occurs on mature  
19 miRNAs in vertebrates, and a modest 3p bias suggests that both precursor and mature miRNAs are  
20 adenylation substrates in *Drosophila* (46–48). In contrast, A-tailing in *C. elegans* shows a strong bias,  
21 occurring primarily on 3p-derived miRNAs (Figure 1D); miRNAs displaying above 1% A-tailing were  
22 significantly enriched in the 3p-derived class of miRNAs (Fisher's exact test p-value < 0.0001). This  
23 suggests that A-tailing in *C. elegans* occurs predominantly on miRNA precursors.

24 Because global developmentally-regulated tailing has been demonstrated in other models (18), we  
25 examined published datasets from developmental time courses to determine whether tailing of *C. elegans*  
26 miRNAs is correlated with any particular developmental stage (52–54). No consistent global differences in  
27 rates of uridylation or other types of tailing were observed (Figure 1E and Figure S2A, Table S5). We were  
28 especially interested in oocyte and early embryo samples since miRNA adenylation is highly prevalent in  
29 these time points and leads to turnover of maternally-contributed miRNAs in other species (18), but neither  
30 adenylation nor uridylation was globally dynamic during the course of early embryonic development in *C.*  
31 *elegans* (Figure S2B, Table S5) (55). When examining the most highly tailed miRNAs from our data  
32 (Figure 1B), these miRNAs were largely expressed fairly evenly across development, with the exception  
33 of the embryo-enriched *mir-35-42* family of miRNAs (of which one member was among the top twelve U-

1 tailed miRNAs and three were among the top twelve A-tailed miRNAs) (Figure S3). When examining the  
2 tailing of the highly tailed miRNAs across development, tailing was approximately equally prevalent across  
3 development (Figure S4).

#### 4 **miRNA uridylation requires CID-1**

5 To determine what role tailing may play in regulating miRNAs in *C. elegans*, we next set out to  
6 identify the enzymes responsible for these modifications. To this end, we performed RNAi against a list of  
7 candidate terminal nucleotidyl transferases (TENTs). For each knockdown, we performed deep sequencing  
8 of small RNAs, and compared the proportion of tailed isoforms to those in three biological replicates of  
9 empty vector. Of RNAi against 18 candidate tailing enzymes, only the RNAi targeting *cid-1* significantly  
10 abrogated miRNA U-tailing ( $p$ -value = 0.0003, Figure 2A-B, Figure S5, Table S6), and this was reproduced  
11 in independent experiments (Figure S6A). Knockdown of *cid-1* decreased U-tailing of both 3p- and 5p-  
12 derived miRNAs equally, suggesting that CID-1 acts on mature miRNAs (Figure S6B). Though *cid-1(lf)*  
13 was previously reported to reduce miRNA U-tailing (56), our study allows for the comparison of the relative  
14 contributions of all putative TENTs, demonstrating that other TENTs are not required. In particular,  
15 knockdown of *pup-2*, a paralog of *cid-1*, does not affect miRNA terminal uridylation (Figure S5).

16 Both CID-1 (also known as PUP-1 or CDE-1) and PUP-2 are orthologs of TUT4 and TUT7, which  
17 act redundantly, along with TENT2/TUT2/GLD2, to uridylylate miRNA precursors in mammals (12, 15, 57).  
18 The common ancestor of nematodes and vertebrates likely contains only one TUT4/7 family gene, and a  
19 recent duplication occurred in each lineage to give rise to two paralogs (Figure 2C) (10). The duplication  
20 in nematodes likely occurred in the common ancestor of Rhabditina or earlier (Figure S7). In contrast, the  
21 *Drosophila* lineage has lost this gene family (10). Overall, the role of CID-1 demonstrates that the function  
22 of the TUT4/7 gene family in uridylation of miRNA species is deeply conserved, though the substrate  
23 specificity shows a different bias (preferentially targeting mature miRNAs rather than precursors in *C.*  
24 *elegans*) (Figure 2C).

25 To evaluate any redundancy between CID-1 and PUP-2, we assessed the U-tailing of miRNAs in  
26 individual knock-out mutants of *cid-1* and *pup-2* and a double *cid-1/pup-2* mutant. Three biological  
27 replicates of wild type and the single and double mutants were profiled by deep sequencing. The data from  
28 single mutant animals recapitulated the results from our RNAi screen. U-tailing was strongly disrupted in  
29 the *cid-1(tm1021)* mutant but not in the *pup-2(tm4344)* mutant (Figure 2D, Table S7). In the *cid-1/pup-*  
30 *2(om129)* double mutant, we observe a decrease in U-tailing that in most cases is comparable to that of the  
31 single *cid-1(tm1021)* mutant (Figure 2D, Table S7). This reaffirms the role of *cid-1* in U-tailing and  
32 suggests very little redundancy in its function with *pup-2*. Although CID-1 and PUP-2 are redundant in  
33 their biological function of protecting germline fate (58), they do not appear to be redundant for this



1 molecular function. CID-1 and PUP-2 are much less similar (17.4%) than human TUT4 and TUT7 (44.5%),  
2 consistent with the lack of redundancy of CID-1 and PUP-2 for miRNA uridylation in *C. elegans*.

### 3 **miRNA adenylation requires F31C3.2/GLDR-2**

4 We also analyzed the RNAi screen of putative TENTs to identify enzymes required for adenylated  
5 miRNA species, with the goal of assessing whether adenylation affects processing or stability of miRNAs.  
6 Because of the generally low level of A tailing and the noise inherent in tailing levels below 1%, we  
7 highlight those miRNAs that were >1% adenylated in empty vector samples in Figure 3. Knockdown of  
8 F31C3.2 reduced A-tailing of these miRNAs ( $p$ -value = 0.0003, Figure 3A-B, Figure S8) in multiple  
9 replicates (Figure S6C).

10 F31C3.2 is in the TENT2/GLD2 gene family of non-canonical cytoplasmic poly(A) polymerases,  
11 and we therefore name it GLD-2-related 2 (GLDR-2) (Figure 3C). The common ancestor of *Bilateria* likely  
12 had a single GLD2 gene, and duplications have occurred in the *Nematoda* lineage (GLD-2 and F31C3.2/  
13 GLDR-2) and the *Drosophila* lineage (GLD2 and WISPY) (10). The nematode duplication likely occurred  
14 in the common ancestor of clades III-V or earlier (Figure S9). The single GLD2 gene in mammals and the  
15 paralog WISPY in *Drosophila* both catalyze adenylation of mature miRNAs (18, 19, 21, 47).

16 To determine whether F31C3.2/GLDR-2 has any functional redundancy with its paralog GLD-2,  
17 we assessed A-tailing in conditions where both genes are disrupted. We generated a F31C3.2/*gldr-2*  
18 knockout mutant, F31C3.2/*gldr-2(cdb187)*, using CRISPR-Cas9, deleting the entire ORF of the gene. The  
19 mutant progeny were viable and superficially wild type. Because disruption of *gld-2* disrupts germline  
20 development and generates infertile animals (59), we used RNAi to knock down *gld-2* in a wild type or  
21 F31C3.2/*gldr-2(cdb187)* mutant background. Four biological replicates of each genotype/RNAi condition  
22 were deep sequenced. Results of single gene disruptions recapitulated those of the RNAi screen. A-tailing  
23 was significantly disrupted in the F31C3.2/*gldr-2(cdb187)* mutant on empty RNAi vector, but not in *gld-2*  
24 RNAi of wild type worms (Figure 3D, Figure S6D, Table S8). When *gld-2* RNAi was performed in the  
25 F31C3.2/*gldr-2(cdb187)* background, the disruption of A-tailing was comparable to that in the  
26 F31C3.2/*gldr-2(cdb187)* mutant on empty RNAi vector (Figure 3D, Figure S6D, Table S8). This suggests  
27 that there is little to no redundancy between F31C3.2/GLDR-2 and GLD-2 in miRNA tailing in *C. elegans*.

28 Here we show that the paralog F31C3.2/GLDR-2 - rather than GLD-2 itself - adenylates miRNAs  
29 in *C. elegans*, though the enrichment of this modification on 3p-derived miRNAs (Figure 1D) suggests that  
30 precursors rather than mature miRNAs are the substrate of F31C3.2/GLDR-2. Although F31C3.2/GLDR-  
31 2 previously had no known function *in vivo*, a high throughput assay in yeast showed that the enzyme is  
32 indiscriminate with respect to substrate nucleotide (60). However, knockdown of F31C3.2/GLDR-2 only

1 affects the prevalence of A tailing (and not C, G, or U additions) in our *in vivo* experiments. Thus, additional  
2 factors in the *C. elegans* cellular context may confer nucleotide substrate specificity to F31C3.2/GLDR-2.

### 3 **RNAi screen does not identify nucleases targeting tailed miRNAs**

4 In many previous studies, tailed miRNA precursors or tailed mature miRNAs are targeted to  
5 specific nucleases (61–64). To determine whether tailed miRNAs are the substrate of a specific nuclease,  
6 we also performed RNAi against a panel of nucleases previously implicated in miRNA turnover (4, 61, 62,  
7 65–68). We observed only subtle effects on tailing (Figure 2A, 3A, S5 and S8). RNAi against exosome  
8 component *exos-4.1* showed statistically significant differences in U-tailing compared to the vector control  
9 ( $p$ -value = 0.016). However, the effect was a slight decrease in tailed species, suggesting an indirect effect  
10 of the RNAi. (The direct effect of knocking down an exonuclease that targets tailed miRNAs would be an  
11 increase in the prevalence of tailing.) Overall, these data suggest that tailed miRNAs may not be specifically  
12 targeted to any of the examined nucleases. (Note that PARN-1 was not included since previous studies  
13 showed no effect of *parn-1(lf)* on miRNA tailing or stability in *C. elegans* (69).) The knockdowns of  
14 nucleases displayed both a robust small RNA response mapping to each targeted locus and the expected  
15 deleterious phenotypes based on previous studies (70–73). Together this suggests that knockdown was  
16 sufficiently potent to impair activity of the enzymes. Since the strong pleiotropic phenotypes induced by  
17 these knockdowns introduce concerns of sample synchrony and staging, we did not analyze the impacts of  
18 these knockdowns on miRNA abundance. Overall, we have not observed evidence for the role of any of  
19 these nucleases in the trimming of tailed miRNAs.

### 20 **miRNAs are relatively long-lived**

21 Having identified the enzymes required for miRNA tailing in *C. elegans*, we sought to examine the  
22 potential involvement of tailing in regulating miRNA turnover. To this end, we first characterized miRNA  
23 turnover in *C. elegans* by measuring miRNA half-lives using a system in which miRNA biogenesis can be  
24 acutely inactivated: a temperature-sensitive allele of the DGCR8 homolog *pash-1* (74). Upon upshift to  
25 restrictive temperature, *pash-1(ts)* no longer processes new miRNAs, and the decay of existing miRNAs  
26 can be observed over time (Figure 4A) (74, 75). To measure miRNA decay, we collected time course  
27 samples 0, 6, 24, and 48 hours after upshift to restrictive temperature. Because miRNAs comprise a large  
28 portion of the small RNA complement and global miRNA levels will change over the time course after  
29 *pash-1* inactivation, synthetic miRNAs not present in the *C. elegans* genome were spiked in to the samples  
30 at a constant concentration relative to total RNA to allow for robust normalization. Adult animals shifted  
31 to restrictive temperature produced a few non-viable progeny and did not proliferate further, so dilution of  
32 miRNAs by increasing amounts of total RNA is minimal in this system. After normalization to spike-ins,

1 global decay of miRNAs was observed over the 48h time course in two biological replicates (Figure 4B,  
2 Table S9).

3 Using spike-in-normalized reads, time course data were fit to exponential decay curves to calculate  
4 miRNA half-lives. Half-lives determined using data from only one replicate were well correlated between  
5 replicates (Figure S10A). Therefore, we used data from both replicates together to fit half-life values with  
6 greater confidence. The fit of the decay curves was best when deep sequencing data were normalized to  
7 spike-ins, as expected, significantly outperforming normalization to total mapped reads (Figure S10B). Data  
8 for miRNAs with half-lives longer than the 48h course of the experiment (14 out of 68 analyzed miRNAs)  
9 generally did not fit the exponential decay curve well (Figure S10C, Table S10). In contrast, shorter-lived  
10 miRNAs fit the curve well, with 40 out of 54 miRNAs having a fit with  $R^2 > 0.8$  (Figure 4C, Figure S10C,  
11 Table S10). Overall, miRNAs were fairly stable, with a median half-life of 20.7h (Figure 4D, Table S10),  
12 similar to most observations in mammalian and *Drosophila* cells (4, 6–8, 76). These results using spike-in  
13 normalization and deep sequencing yield longer half-lives than a previous study using *pash-1(ts)* (Figure  
14 S10D) (74). The previous study employed microarray miRNA quantification and normalization to non-  
15 miRNA small RNAs (siRNA and mirtron); when our data were normalized to mirtron reads, we observed  
16 a similar range of half-lives to their study (Figure S10E). This suggests that mirtron or siRNA normalization  
17 does not effectively control for library-wide changes. Nonetheless, both studies highlighted similar sets of  
18 fast-decaying miRNAs, with *mir-61*, *mir-71*, *mir-253*, and *mir-250* among the six lowest half-lives in both  
19 datasets (Table S10) (74).

## 20 **The proportion of tailed and trimmed miRNAs increases over time after biogenesis**

21 Previous studies have demonstrated that terminal modifications correlate with miRNA turnover  
22 (22, 23, 26, 30, 31). These studies demonstrated that miRNAs that are targeted for decay display high levels  
23 of 3' tailing. In our datasets, as miRNAs turn over during the time course after PASH-1 inactivation, the  
24 ensemble of miRNAs becomes increasingly skewed towards older miRNAs (approaching turnover). To  
25 determine whether miRNA terminal modifications are associated (correlatively or causatively) with  
26 miRNA turnover in our dataset, we quantified tailing across the time course. We observed that indeed later  
27 time points displayed higher levels of uridylation (Figure 5A-B, Table S9). This global trend included a  
28 large increase in tailing for *mir-70-3p* and many other miRNAs, although not all miRNAs displayed  
29 increased tailing over the time course (Figure 5C, Table S9). The increase of U-tailing on aging miRNAs  
30 is consistent with the mature miRNA being the substrate of U-tailing as suggested above (Figure 1C-D).  
31 No change was observed in adenylation of miRNAs over the time course (Figure 5A), consistent with its  
32 substrate being miRNA precursors.

1 Like tailing, 3' trimming is also often observed concomitant with tailing (22, 26). Therefore, we  
2 also analyzed trimming over the time course after PASH-1 inactivation. Like tailing, global 3' trimming  
3 increased in later time points, as indicated by a lower proportion of canonical-length reads and increased  
4 proportion of shorter genome-matching reads (Figure S11). Like tailing, this subtle global trend was more  
5 apparent when examining individual miRNAs (Figure S11). Thus, both tailing and trimming increase in  
6 older miRNAs that are approaching turnover.

7 If miRNA tailing regulates turnover, two models may explain the increase in U-tailing observed  
8 over the time course after PASH-1 inactivation. On one hand, if tailing triggers turnover, then older  
9 miRNAs would be tailed as they approach decay, increasing the relative abundance of tailed species over  
10 time. On the other hand, if tailing protects miRNAs from decay, this could also result in the relative  
11 accumulation of tailed miRNAs at later time points, as non-tailed miRNAs are decayed more rapidly.

12 We therefore asked whether tailing is correlated (or anti-correlated) with the rate of miRNA  
13 turnover. We did not observe an overall correlation between initial prevalence of the U-tailed isoform and  
14 half-life for a given miRNA (Figure S12A), nor between rate of increase in tailing and half-life (Figure  
15 S12B). While this indicates that terminal uridylation is unlikely to be the primary determinant of turnover,  
16 uridylation might play a modulatory role that is not apparent in bulk analysis due to larger effects of other  
17 unknown parameters.

### 18 **Abrogation of miRNA tailing does not affect miRNA turnover**

19 To determine whether uridylation may play a modulatory role - either stimulating or impairing  
20 turnover - we sought to disrupt miRNA tailing and then measure rates of miRNA turnover in its absence.  
21 In wild type animals, disrupting U-tailing in the context of *cid-1* RNAi, *cid-1* knockout, or *cid-1/pup-2*  
22 double knockout did not significantly change abundance of miRNAs, suggesting that turnover is unchanged  
23 (Figure 6A-C). To further examine the effect of tailing on miRNA decay, we profiled in *cid-1* RNAi after  
24 PASH-1 inactivation in the *pash-1(ts)* background (0 and 24h after upshift). RNAi against *cid-1* reduced  
25 U-tailing at both time points (Figure S13A, Table S11). However, when we examined the change in miRNA  
26 abundance from zero to 24h after PASH-1 inactivation, *cid-1* RNAi did not have a global effect. We divided  
27 the miRNAs into subsets based on the percent of tailed species and saw no effect on turnover in miRNAs  
28 that were tailed 0-1%, 1-2%, or 2-30% (Figure 6D). One exception to this was miRNAs of the embryo-  
29 enriched *mir-35-41* cluster, which showed a higher log<sub>2</sub>fold change in *cid-1* RNAi than vector control  
30 (Figure 6E). However, this is likely due to a lower starting amount of these miRNAs in T0 *cid-1* RNAi  
31 samples (Figure 6F); indeed, these miRNAs are the only ones with less than half the abundance in *cid-1*  
32 RNAi T0 samples as compared to vector T0 samples. Furthermore, both strands of the miRNA duplex  
33 derived from these precursors behaved similarly, supporting an effect of *cid-1* RNAi on transcription or

1 biogenesis rather than on decay rate of the mature miRNA species (Figure 6E-F). Because these miRNAs  
2 are largely germline and embryo-specific (53, 77), the difference in their abundance most likely corresponds  
3 to slight differences in staging of *cid-1* RNAi T0 samples due to pleiotropic effects of *cid-1(lf)*, which  
4 negatively impacts germline function and embryo production (58). Finally, we also specifically examined  
5 miRNAs that show high increases in uridylation after *pash-1* inactivation to determine whether these cases  
6 might be particularly sensitive to disrupting uridylation by *cid-1* RNAi. For these miRNAs, tailing was  
7 disrupted, but turnover was not reproducibly altered (Figure 6G). Taken together, these data show that  
8 miRNA uridylation in *C. elegans* is not a global regulator of miRNA decay.

9         Next, we examined whether A-tailing altered miRNA abundance or turnover. In wild type, although  
10 F31C3.2/*gldr-2* RNAi reduces A-tailing, RNAi did not alter miRNA abundance (Figure S14A-B).  
11 F31C3.2/*gldr-2* knockout and F31C3.2/*gldr-2* knockout with *gld-2* RNAi also showed minimal effects on  
12 miRNA abundance (Figures S14C-F). Small changes in the abundance of three *mir-35-42* family members  
13 appeared to be due to changes in synthesis, rather than changes in turnover of the miRNAs, as indicated by  
14 similar changes in star strand abundance (Figure S14G); as noted above, this is likely due to slight staging  
15 differences due to pleiotropic effects. In the *pash-1(ts)* setting, fewer miRNAs could be examined with high  
16 confidence due to lower abundance and/or lower A-tailing. (Lower miRNA abundance may be the result  
17 of reduction of *pash-1* function even at permissive temperature, and likewise, a reduced lifetime of miRNA  
18 precursors in this setting could lead to reduced A-tailing.) Nonetheless, we still observed that F31C3.2/*gldr-*  
19 *2* RNAi abrogated A-tailing in the 24h time point (Figure S14H, Table S11). When examining the change  
20 in miRNA abundance from zero to 24h after temperature shift, F31C3.2/*gldr-2* RNAi did not affect the rate  
21 of miRNA decay (Figure S14I). Therefore, the adenylation mediated by F31C3.2/GLDR-2 does not  
22 regulate miRNA stability.

### 23         **High levels of mirtron uridylation do not affect abundance**

24         Mirtrons are non-canonical miRNAs that derive from small introns; debranching of these intron  
25 lariats results in a miRNA precursor-like hairpin structure, bypassing the requirement for Microprocessor-  
26 mediated cleavage (78, 79). Previous work showed that mirtron precursors are highly uridylated and that,  
27 in *Drosophila*, this uridylation is carried out by the *Drosophilidae*-specific TUTase6-related enzyme Tailor  
28 and negatively regulates mirtron abundance (10, 16, 17, 80). In wild type sequencing libraries, only one  
29 mirtron, *mir-62*, was abundant enough for reliable tailing analysis. However, in *pash-1(ts)* libraries at  
30 restrictive temperature, mirtrons are relatively elevated in sequencing libraries since they do not depend on  
31 Microprocessor activity, while canonical miRNAs are globally depleted. This allowed for the analysis of  
32 tailing of multiple mirtrons. We observed that (as previously reported from aggregate sequencing data), 3p-  
33 derived mirtrons are highly uridylated to a much greater degree than canonical miRNAs, with the exception

1 of *mir-62* (Figure S13B) (80). Not only is *mir-62* atypical in its proportion of tailing, but *mir-62* is also  
2 much more abundant than the other mirtrons (Figure S13B). Like uridylation of canonical miRNAs,  
3 uridylation of mirtrons also required CID-1 (Figure S13B). Surprisingly, although knockdown of *cid-1*  
4 strongly abrogated mirtron tailing, the abundance of the mirtrons was not elevated as was observed in  
5 *Drosophila* (upon knockdown of Tailor) (Figure S13B). Therefore, although the high rate of U-tailing is  
6 conserved for most *C. elegans* mirtrons, this modification does not regulate mirtron abundance.

### 7 **Standard over-expression transgenes unlikely to induce TDMD in *C. elegans***

8 Recent work provided evidence that some *C. elegans* miRNAs are targeted by TDMD, whereas  
9 another previous study described target-mediated miRNA protection (TMMP) of miRNAs in *C. elegans*  
10 (35, 81). To further interrogate the relationship between target binding and miRNA stability in *C. elegans*,  
11 we attempted to induce TDMD of specific miRNAs using exogenous transgenic triggers. We modified a  
12 ubiquitously expressed GFP construct (*Peft-3::GFP::tbb-2* 3'UTR) to contain two highly complementary  
13 binding sites for a miRNA of interest in the transgene's 3'UTR (Figure S15A). We chose to target *lin-4*,  
14 *mir-237*, and *mir-85* because of their moderate expression level, moderate to slow decay rate, and low  
15 proportion of tailing. Also, the biology of *lin-4* is well studied, and it shares a seed sequence with *mir-237*  
16 (82). Extra-chromosomal arrays expressing these transgenes did not induce any phenotype (such as a *lin-4*  
17 loss-of-function phenotype). Deep sequencing showed that the miRNAs were not altered in abundance in  
18 the presence of the transgene expressing their cognate putative TDMD trigger (Figure S15B). The TDMD  
19 triggers also did not alter tailing of the targeted miRNAs (Figure S15C). Most previously described triggers  
20 of TDMD are expressed at the same or higher levels than the targeted miRNA (23, 24, 29); the most efficient  
21 known TDMD trigger, the lncRNA Cyrano, is an extreme case which effects multiple turnover TDMD  
22 when expressed at a 17-fold lower level than its target miRNA (31). To determine if our transgenes are  
23 expressed at a similar stoichiometry with respect to the targeted miRNAs, we performed absolute  
24 quantification of the transgene mRNA and the targeted miRNAs using digital droplet PCR (ddPCR) and  
25 miRNA Taqman assays, respectively. Despite being expressed from a high-copy transgene with an efficient  
26 promoter, each transgene mRNA was >300-fold lower in abundance than the targeted miRNA (Figure  
27 S15D). Thus, the stoichiometry renders these transgenes unlikely to induce TDMD. We are so far unable  
28 to dissect the features of TDMD in *C. elegans* using traditional protein-coding transgenes as synthetic  
29 triggers.

30

## 1 Discussion

2 In this work, we characterize the nature of miRNA tailing in *C. elegans*, with the broad view of  
3 determining ancestral functions of this class of post-transcriptional modification. We show that uridylation  
4 is far more prevalent than adenylation in *C. elegans*, unlike mammals and *Drosophila* in which both  
5 modifications are common (46–49).

6 We show that the substrate of these additions is shifted in different lineages. Based on its even  
7 distribution between 3p- and 5p-derived miRNAs, we infer that uridylation targets mature miRNAs in *C.*  
8 *elegans*, whereas precursors are the predominant substrate in mammals and *Drosophila* (33, 46–48, 51). In  
9 contrast, adenylation is skewed towards 3p-derived miRNAs in *C. elegans*, indicating that miRNA  
10 precursors are its likely substrate, unlike in vertebrates where mature miRNAs are more often adenylated  
11 and *Drosophila* where both precursors and mature miRNAs are likely substrates (46–48).

12 Despite the shifts in the apparent substrate of the modification, the enzymes required for these  
13 modifications are largely conserved. MiRNA uridylation requires CID-1, which is in the same TUT-4/7  
14 gene family that carries out this modification (along with TUT2/GLD2) in mammals (12, 15, 57). MiRNA  
15 adenylation requires F31C3.2/GLDR-2. F31C3.2/GLDR-2 is in the TUT2/GLD2/PAPD-4 gene family  
16 which carries out miRNA adenylation in mammals and *Drosophila* (18, 19, 21, 47). Importantly, the  
17 enzymatic activities of these enzymes in uridylation/adenylation has been previously demonstrated *in vitro*  
18 or in a heterologous tethering assay (56, 60).

19 We characterize rates of miRNA decay in *C. elegans*, which are largely similar to those in other  
20 organisms (4, 6–8, 76). The median half-life – 20.7h – is relatively long. Half-lives in this study may even  
21 be slightly underestimated due to slight expansion of the culture after upshift to restrictive temperature.  
22 Nonetheless, certain miRNAs (especially *mir-61*, *mir-71*, *mir-253*, and *mir-250*) are reproducibly short-  
23 lived across replicates in our study and previous studies (74). How these fast decay rates are specified will  
24 be an important area of ongoing study. Moreover, we have only analyzed a single condition; decay may be  
25 differentially regulated for subsets of miRNAs in distinct developmental stages or under stress conditions.  
26 Notably, a study conducted in L1 stage larvae highlighted different fast-decaying miRNAs than our study  
27 in adults (83), suggesting that miRNA turnover may be developmentally regulated.

28 Although we observed that the proportion of tailed species increased over time after biogenesis,  
29 disrupting tailing had no impact on turnover. This is consistent with recent kinetic analysis which  
30 demonstrated that tailing is faster than 3' trimming, so miRNAs are more likely to carry a tail as they  
31 approach decay (8). TDMD is the most frequently-studied context in which tailing correlates with decay,  
32 yet recent work on TDMD suggests that tailing is correlative – not causative – of TDMD, and that

1 conformational changes that promote decay of the Argonaute-miRNA complex also expose the miRNA 3'  
2 end to TENTs (31, 32, 34, 35). However, in specific developmental contexts, tailing does promote  
3 wholesale miRNA turnover (18). Therefore, cell-type or developmental contexts which we have not yet  
4 examined may also couple decay to tailing in *C. elegans*. By identifying the enzymes required for miRNA  
5 tailing, this study lays the groundwork for discovering and dissecting such regulation.

## 6 **Data Availability**

7 All raw sequence data will be deposited in NCBI Sequence Read Archive (BioProject Number  
8 PRJNA703306). Reviewer link:  
9 <https://dataview.ncbi.nlm.nih.gov/object/PRJNA703306?reviewer=2h12a5i72qildfkt3l259bdli9>

## 10 **Funding**

11 This work was funded by the NIDDK Intramural Research Program (ZIA DK075147).

## 12 **Acknowledgments**

13 We thank WormBase, the NIDDK Genomics Core, the NCI CCR Genomics Core, and NIH High  
14 Performance Computing. Strains are regularly received from the CGC, which is funded by NIH Office of  
15 Research Infrastructure Programs (P40 OD010440). Thank you to Anna Zinovyeva and members of the  
16 McJunkin lab for helpful discussions and to Cameron Palmer for bioinformatics support.

17

18



## 1 References

- 2 1. Dexheimer,P.J. and Cochella,L. (2020) MicroRNAs: From Mechanism to Organism. *Front. Cell Dev.*  
3 *Biol.*, **8**.
- 4 2. Alberti,C. and Cochella,L. (2017) A framework for understanding the roles of miRNAs in animal  
5 development. *Dev.*, **144**, 2548–2559.
- 6 3. Ha,M. and Kim,V.N. (2014) Regulation of microRNA biogenesis. *Nat. Rev. Mol. Cell Biol.*, **15**, 509–  
7 24.
- 8 4. Bail,S., Swerdel,M., Liu,H., Jiao,X., Goff,L.A., Hart,R.P. and Kiledjian,M. (2010) Differential  
9 regulation of microRNA stability. *RNA*, **16**, 1032–1039.
- 10 5. Rissland,O.S., Hong,S.-J. and Bartel,D.P. (2011) MicroRNA destabilization enables dynamic  
11 regulation of the miR-16 family in response to cell-cycle changes. *Mol. Cell*, **43**, 993–1004.
- 12 6. Marzi,M.J., Ghini,F., Cerruti,B., De Pretis,S., Bonetti,P., Giacomelli,C., Gorski,M.M., Kress,T.,  
13 Pelizzola,M., Muller,H., *et al.* (2016) Degradation dynamics of micrnas revealed by a novel pulse-  
14 chase approach. *Genome Res.*, **26**, 554–565.
- 15 7. Reichholf,B., Herzog,V.A., Fasching,N., Manzenreither,R.A., Sowemimo,I. and Ameres,S.L. (2019)  
16 Time-Resolved Small RNA Sequencing Unravels the Molecular Principles of MicroRNA  
17 Homeostasis. *Mol. Cell*, **75**, 756-768.e7.
- 18 8. Kingston,E.R. and Bartel,D.P. (2019) Global analyses of the dynamics of mammalian microRNA  
19 metabolism. *Genome Res.*, 10.1101/gr.251421.119.
- 20 9. Krol,J., Busskamp,V., Markiewicz,I., Stadler,M.B., Ribi,S., Richter,J., Duebel,J., Bicker,S.,  
21 Fehling,H.J., Schübeler,D., *et al.* (2010) Characterizing light-regulated retinal microRNAs reveals  
22 rapid turnover as a common property of neuronal microRNAs. *Cell*, **141**, 618–631.
- 23 10. Modepalli,V. and Moran,Y. (2017) Evolution of miRNA Tailing by 3' Terminal Uridylyl Transferases  
24 in Metazoa. *Genome Biol. Evol.*, **9**, 1547–1560.
- 25 11. De Almeida,C., Scheer,H., Zuber,H. and Gagliardi,D. (2018) RNA uridylation: a key  
26 posttranscriptional modification shaping the coding and noncoding transcriptome. *Wiley Interdiscip.*  
27 *Rev. RNA*, **9**.
- 28 12. Kim,B., Ha,M., Loeff,L., Chang,H., Simanshu,D.K., Li,S., Fareh,M., Patel,D.J., Joo,C. and Kim,V.N.  
29 (2015) TUT7 controls the fate of precursor microRNAs by using three different uridylation  
30 mechanisms. *EMBO J.*, **34**, 1801–1815.
- 31 13. Kim,H., Kim,J., Yu,S., Lee,Y.Y., Park,J., Choi,R.J., Yoon,S.J., Kang,S.G. and Kim,V.N. (2020) A  
32 Mechanism for microRNA Arm Switching Regulated by Uridylation. *Mol. Cell*, **78**, 1224-1236.e5.
- 33 14. Heo,I., Joo,C., Cho,J., Ha,M., Han,J. and Kim,V.N. (2008) Lin28 mediates the terminal uridylation of  
34 let-7 precursor MicroRNA. *Mol. Cell*, **32**, 276–284.
- 35 15. Heo,I., Joo,C., Kim,Y.-K.K., Ha,M., Yoon,M.-J.J., Cho,J., Yeom,K.-H.H., Han,J. and Kim,V.N.

- 1 (2009) TUT4 in concert with Lin28 suppresses microRNA biogenesis through pre-microRNA  
2 uridylation. *Cell*, **138**, 696–708.
- 3 16. Reimão-Pinto, M.M., Ignatova, V., Burkard, T.R., Hung, J.H., Manzenreither, R.A., Sowemimo, I.,  
4 Herzog, V.A., Reichholf, B., Fariña-Lopez, S. and Ameres, S.L. (2015) Uridylation of RNA Hairpins  
5 by Tailor Confines the Emergence of MicroRNAs in *Drosophila*. *Mol. Cell*, **59**, 203–216.
- 6 17. Bortolamiol-Becet, D., Hu, F., Jee, D., Wen, J., Okamura, K., Lin, C.J., Ameres, S.L. and Lai, E.C. (2015)  
7 Selective Suppression of the Splicing-Mediated MicroRNA Pathway by the Terminal  
8 Uridyltransferase Tailor. *Mol. Cell*, **59**, 217–228.
- 9 18. Lee, M., Choi, Y., Kim, K., Jin, H., Lim, J., Nguyen, T.A.A., Yang, J., Jeong, M., Giraldez, A.J.J.,  
10 Yang, H., *et al.* (2014) Adenylation of maternally inherited microRNAs by Wispy. *Mol. Cell*, **56**,  
11 696–707.
- 12 19. Katoh, T., Sakaguchi, Y., Miyauchi, K., Suzuki, T., Kashiwabara, S.-I., Baba, T. and Suzuki, T. (2009)  
13 Selective stabilization of mammalian microRNAs by 3' adenylation mediated by the cytoplasmic  
14 poly(A) polymerase GLD-2. *Genes Dev.*, **23**, 433–8.
- 15 20. Burns, D.M., D'Ambrogio, A., Nottrott, S. and Richter, J.D. (2011) CPEB and two poly(A) polymerases  
16 control miR-122 stability and p53 mRNA translation. *Nature*, **473**, 105–108.
- 17 21. D'Ambrogio, A., Gu, W., Udagawa, T., Mello, C.C. and Richter, J.D. (2012) Specific miRNA  
18 stabilization by Gld2-catalyzed monoadenylation. *Cell Rep.*, **2**, 1537–45.
- 19 22. Ameres, S.L., Horwich, M.D., Hung, J.-H., Xu, J., Ghildiyal, M., Weng, Z. and Zamore, P.D. (2010)  
20 Target RNA-directed trimming and tailing of small silencing RNAs. *Science*, **328**, 1534–1539.
- 21 23. Baccarini, A., Chauhan, H., Gardner, T.J., Jayaprakash, A.D., Sachidanandam, R. and Brown, B.D.  
22 (2011) Kinetic analysis reveals the fate of a microRNA following target regulation in mammalian  
23 cells. *Curr. Biol.*, **21**, 369–376.
- 24 24. de la Mata, M., Gaidatzis, D., Vitanescu, M., Stadler, M.B., Wentzel, C., Scheiffele, P., Filipowicz, W.  
25 and Grosshans, H. (2015) Potent degradation of neuronal miRNAs induced by highly complementary  
26 targets. *EMBO Rep.*, **16**, 500–511.
- 27 25. Cazalla, D., Yario, T., Steitz, J.A. and Steitz, J. (2010) Down-regulation of a host microRNA by a  
28 Herpesvirus saimiri noncoding RNA. *Science*, **328**, 1563–6.
- 29 26. Marcinowski, L., Tanguy, M., Krmpotic, A., Rädle, B., Lisnić, V.J., Tuddenham, L., Chane-Woon-  
30 Ming, B., Ruzsics, Z., Erhard, F., Benkartek, C., *et al.* (2012) Degradation of cellular mir-27 by a  
31 novel, highly abundant viral transcript is important for efficient virus replication in vivo. *PLoS*  
32 *Pathog.*, **8**, e1002510.
- 33 27. Libri, V., Helwak, A., Miesen, P., Santhakumar, D., Borger, J.G., Kudla, G., Grey, F., Tollervey, D. and  
34 Buck, A.H. (2012) Murine cytomegalovirus encodes a miR-27 inhibitor disguised as a target. *Proc.*  
35 *Natl. Acad. Sci. U. S. A.*, **109**, 279–284.

- 1 28. Piwecka,M., Glažar,P., Hernandez-Miranda,L.R., Memczak,S., Wolf,S.A., Rybak-Wolf,A.,  
2 Filipchuk,A., Klironomos,F., Cerda Jara,C.A., Fenske,P., *et al.* (2017) Loss of a mammalian circular  
3 RNA locus causes miRNA deregulation and affects brain function. *Science*, **357**, eaam8526.
- 4 29. Ghini,F., Rubolino,C., Climent,M., Simeone,I., Marzi,M.J. and Nicassio,F. (2018) Endogenous  
5 transcripts control miRNA levels and activity in mammalian cells by target-directed miRNA  
6 degradation. *Nat. Commun.*, **9**, 3119.
- 7 30. Bitetti,A., Mallory,A.C., Golini,E., Carrieri,C., Carreño Gutiérrez,H., Perlas,E., Pérez-Rico,Y.A.,  
8 Tocchini-Valentini,G.P., Enright,A.J., Norton,W.H.J., *et al.* (2018) MicroRNA degradation by a  
9 conserved target RNA regulates animal behavior. *Nat. Struct. Mol. Biol.*, **25**, 244–251.
- 10 31. Kleaveland,B., Shi,C.Y., Stefano,J. and Bartel,D.P. (2018) A Network of Noncoding Regulatory  
11 RNAs Acts in the Mammalian Brain. *Cell*, **174**, 350-362.e17.
- 12 32. Sheu-Gruttadauria,J., Pawlica,P., Klum,S.M., Wang,S., Yario,T.A., Schirle Oakdale,N.T., Steitz,J.A.  
13 and MacRae,I.J. (2019) Structural Basis for Target-Directed MicroRNA Degradation. *Mol. Cell*, **75**,  
14 1243-1255.e7.
- 15 33. Yang,A., Shao,T.J., Bofill-De Ros,X., Lian,C., Villanueva,P., Dai,L. and Gu,S. (2020) AGO-bound  
16 mature miRNAs are oligouridylated by TUTs and subsequently degraded by DIS3L2. *Nat.*  
17 *Commun.*, **11**.
- 18 34. Han,J., LaVigne,C.A., Jones,B.T., Zhang,H., Gillett,F. and Mendell,J.T. (2020) A ubiquitin ligase  
19 mediates target-directed microRNA decay independently of tailing and trimming. *Science*, **370**,  
20 eabc9546.
- 21 35. Shi,C.Y., Kingston,E.R., Kleaveland,B., Lin,D.H., Stubna,M.W. and Bartel,D.P. (2020) The  
22 ZSWIM8 ubiquitin ligase mediates target-directed microRNA degradation. *Science*, **370**, eabc9359.
- 23 36. Yang,A., Bofill-De Ros,X., Shao,T.J., Jiang,M., Li,K., Villanueva,P., Dai,L. and Gu,S. (2019) 3'  
24 Uridylation Confers miRNAs with Non-canonical Target Repertoires. *Mol. Cell*, **75**, 511-522.e4.
- 25 37. Patel,P., Ramachandruni,S.D., Kakrana,A., Nakano,M. and Meyers,B.C. (2016) miTRATA: a web-  
26 based tool for microRNA Truncation and Tailing Analysis. *Bioinformatics*, **32**, 450–452.
- 27 38. Kozomara,A. and Griffiths-Jones,S. (2014) MiRBase: Annotating high confidence microRNAs using  
28 deep sequencing data. *Nucleic Acids Res.*, **42**, D68–D73.
- 29 39. Langmead,B., Trapnell,C., Pop,M. and Salzberg,S.L. (2009) Ultrafast and memory-efficient  
30 alignment of short DNA sequences to the human genome. *Genome Biol.*, **10**, R25.
- 31 40. Kumar,S., Stecher,G., Li,M., Knyaz,C. and Tamura,K. (2018) MEGA X: Molecular evolutionary  
32 genetics analysis across computing platforms. *Mol. Biol. Evol.*, **35**, 1547–1549.
- 33 41. Bolt,B.J., Rodgers,F.H., Shafie,M., Kersey,P.J., Berriman,M. and Howe,K.L. (2018) Using  
34 WormBase ParaSite: An integrated platform for exploring helminth genomic data. In *Methods in*  
35 *Molecular Biology*. Humana Press Inc., Vol. 1757, pp. 471–491.

- 1 42. Arribere, J.A., Bell, R.T., Fu, B.X.H., Artiles, K.L., Hartman, P.S. and Fire, A.Z. (2014) Efficient marker-  
2 free recovery of custom genetic modifications with CRISPR/Cas9 in *Caenorhabditis elegans*.  
3 *Genetics*, **198**, 837–46.
- 4 43. Frøkjær-Jensen, C., Davis, M.W., Ailion, M. and Jorgensen, E.M. (2012) Improved Mos1-mediated  
5 transgenesis in *C. elegans*. *Nat. Methods*, **9**, 117–118.
- 6 44. Dickinson, D.J., Pani, A.M., Heppert, J.K., Higgins, C.D. and Goldstein, B. (2015) Streamlined Genome  
7 Engineering with a Self-Excising Drug Selection Cassette. *Genetics*, **200**, 1035–49.
- 8 45. Frøkjær-Jensen, C., Davis, M.W., Hopkins, C.E., Newman, B.J., Thummel, J.M., Olesen, S.-P.,  
9 Grunnet, M. and Jorgensen, E.M. (2008) Single-copy insertion of transgenes in *Caenorhabditis*  
10 *elegans*. *Nat. Genet.*, **40**, 1375–1383.
- 11 46. Chiang, H.R., Schoenfeld, L.W., Ruby, J.G., Auyeung, V.C., Spies, N., Baek, D., Johnston, W.K.,  
12 Russ, C., Luo, S., Babiarz, J.E., *et al.* (2010) Mammalian microRNAs: experimental evaluation of  
13 novel and previously annotated genes. *Genes Dev.*, **24**, 992–1009.
- 14 47. Burroughs, A.M., Ando, Y., de Hoon, M.J., Tomaru, Y., Nishibu, T., Ukekawa, R., Funakoshi, T.,  
15 Kurokawa, T., Suzuki, H., Hayashizaki, Y., *et al.* (2010) A comprehensive survey of 3' animal  
16 miRNA modification events and a possible role for 3' adenylation in modulating miRNA targeting  
17 effectiveness. *Genome Res.*, **20**, 1398–1410.
- 18 48. Berezikov, E., Robine, N., Samsonova, A., Westholm, J.O., Naqvi, A., Hung, J.H., Okamura, K., Dai, Q.,  
19 Bortolamiol-Becet, D., Martin, R., *et al.* (2011) Deep annotation of *Drosophila melanogaster*  
20 microRNAs yields insights into their processing, modification, and emergence. *Genome Res.*, **21**,  
21 203–215.
- 22 49. Wyman, S.K., Knouf, E.C., Parkin, R.K., Fritz, B.R., Lin, D.W., Dennis, L.M., Krouse, M.A.,  
23 Webster, P.J. and Tewari, M. (2011) Post-transcriptional generation of miRNA variants by multiple  
24 nucleotidyl transferases contributes to miRNA transcriptome complexity. *Genome Res.*, **21**, 1450–  
25 1461.
- 26 50. Song, J., Wang, X., Song, B., Gao, L., Mo, X., Yue, L., Yang, H., Lu, J., Ren, G., Mo, B., *et al.* (2019)  
27 Prevalent cytidylation and uridylation of precursor miRNAs in *Arabidopsis*. *Nat. Plants*, **5**, 1260–  
28 1272.
- 29 51. Thornton, J.E., Du, P., Jing, L., Sjekloca, L., Lin, S., Grossi, E., Sliz, P., Zon, L.I. and Gregory, R.I. (2014)  
30 Selective microRNA uridylation by Zcchc6 (TUT7) and Zcchc11 (TUT4). *Nucleic Acids Res.*, **42**,  
31 11777–11791.
- 32 52. Batista, P.J., Ruby, J.G., Claycomb, J.M., Chiang, R., Fahlgren, N., Kasschau, K.D., Chaves, D.A.,  
33 Gu, W., Vasale, J.J., Duan, S., *et al.* (2008) PRG-1 and 21U-RNAs Interact to Form the piRNA  
34 Complex Required for Fertility in *C. elegans*. *Mol. Cell*, **31**, 67–78.
- 35 53. Kato, M., de Lencastre, A., Pincus, Z. and Slack, F.J. (2009) Dynamic expression of small non-coding

- 1 RNAs, including novel microRNAs and piRNAs/21U-RNAs, during *Caenorhabditis elegans*  
2 development. *Genome Biol.*, **10**, R54.
- 3 54. Shi,Z., Montgomery,T.A., Qi,Y. and Ruvkun,G. (2013) High-throughput sequencing reveals  
4 extraordinary fluidity of miRNA, piRNA, and siRNA pathways in nematodes. *Genome Res.*, **23**,  
5 497–508.
- 6 55. Stoeckius,M., Maaskola,J., Colombo,T., Rahn,H.-P., Friedländer,M.R., Li,N., Chen,W., Piano,F. and  
7 Rajewsky,N. (2009) Large-scale sorting of *C. elegans* embryos reveals the dynamics of small RNA  
8 expression. *Nat. Methods*, **6**, 745–751.
- 9 56. van Wolfswinkel,J.C., Claycomb,J.M., Batista,P.J., Mello,C.C., Berezikov,E. and Ketting,R.F. (2009)  
10 CDE-1 Affects Chromosome Segregation through Uridylation of CSR-1-Bound siRNAs. *Cell*, **139**,  
11 135–148.
- 12 57. Heo,I., Ha,M., Lim,J., Yoon,M.-J., Park,J.-E., Kwon,S.C., Chang,H. and Kim,V.N. (2012) Mono-  
13 uridylation of pre-microRNA as a key step in the biogenesis of group II *let-7* microRNAs. *Cell*, **151**,  
14 521–532.
- 15 58. Li,Y. and Maine,E.M. (2018) The balance of poly(U) polymerase activity ensures germline identity,  
16 survival and development in *caenorhabditis elegans*. *Dev.*, **145**.
- 17 59. Kadyk,L.C. and Kimble,J. (1998) Genetic regulation of entry into meiosis in *Caenorhabditis elegans*.  
18 *Development*, **125**, 1803–1813.
- 19 60. Preston,M.A., Porter,D.F., Chen,F., Buter,N., Lapointe,C.P., Keles,S., Kimble,J. and Wickens,M.  
20 (2019) Unbiased screen of RNA tailing activities reveals a poly(UG) polymerase. *Nat. Methods*, **16**,  
21 437–445.
- 22 61. Chang,H.M., Triboulet,R., Thornton,J.E. and Gregory,R.I. (2013) A role for the Perlman syndrome  
23 exonuclease Dis3l2 in the *Lin28-let-7* pathway. *Nature*, **497**, 244–248.
- 24 62. Ustianenko,D., Hrossova,D., Potesil,D., Chalupnikova,K., Hrazdilova,K., Pachernik,J., Cetkovska,K.,  
25 Uldrijan,S., Zdrahal,Z. and Vanacova,A. (2013) Mammalian DIS3L2 exoribonuclease targets the  
26 uridylated precursors of *let-7* miRNAs. *RNA*, **19**, 1632–1638.
- 27 63. Yoda,M., Cifuentes,D., Izumi,N., Sakaguchi,Y., Suzuki,T., Giraldez,A.J. and Tomari,Y. (2013)  
28 Poly(A)-specific ribonuclease mediates 3'-end trimming of argonaute2-cleaved precursor micromRNAs.  
29 *Cell Rep.*, **5**, 715–726.
- 30 64. Katoh,T., Hojo,H. and Suzuki,T. (2015) Destabilization of microRNAs in human cells by 3'  
31 deadenylation mediated by PARN and CUGBP1. *Nucleic Acids Res.*, **43**, 7521–7534.
- 32 65. Chatterjee,S., Grosshans,H. and Großhans,H. (2009) Active turnover modulates mature microRNA  
33 activity in *Caenorhabditis elegans*. *Nature*, **461**, 546–549.
- 34 66. Bossé,G.D., Rügger,S., Ow,M.C., Vasquez-Rifo,A., Rondeau,E.L., Ambros,V.R. and Simard,M.J.  
35 (2013) The decapping scavenger enzyme DCS-1 controls microRNA levels in *Caenorhabditis*

- 1 *C. elegans*. *Mol. Cell*, **50**, 281–287.
- 2 67. Haas,G., Cetin,S., Messmer,M., Chane-Woon-Ming,B., Terenzi,O., Chicher,J., Kuhn,L., Hammann,P.  
3 and Pfeffer,S. (2016) Identification of factors involved in target RNA-directed microRNA  
4 degradation. *Nucleic Acids Res.*, **44**, 2873–87.
- 5 68. Elbarbary,R.A., Miyoshi,K., Myers,J.R., Du,P., Ashton,J.M., Tian,B. and Maquat,L.E. (2017) Tudor-  
6 SN-mediated endonucleolytic decay of human cell microRNAs promotes G<sub>1</sub>/S phase transition.  
7 *Science (80-. )*, **356**, 859–862.
- 8 69. Tang,W., Tu,S., Lee,H.C., Weng,Z. and Mello,C.C. (2016) The RNase PARN-1 Trims piRNA 3'  
9 Ends to Promote Transcriptome Surveillance in *C. elegans*. *Cell*, **164**, 974–984.
- 10 70. Kamath,R.S., Martinez-Campos,M., Zipperlen,P., Fraser,A.G. and Ahringer,J. (2001) Effectiveness of  
11 specific RNA-mediated interference through ingested double-stranded RNA in *Caenorhabditis*  
12 *elegans*. *Genome Biol.*, **2**.
- 13 71. Maeda,I., Kohara,Y., Yamamoto,M. and Sugimoto,A. (2001) Large-scale analysis of gene function in  
14 *Caenorhabditis elegans* by high-throughput RNAi. *Curr. Biol.*, **11**, 171–176.
- 15 72. Sönnichsen,B., Koski,L.B., Walsh,A., Marschall,P., Neumann,B., Brehm,M., Alleaume,A.M.,  
16 Artelt,J., Bettencourt,P., Cassin,E., *et al.* (2005) Full-genome RNAi profiling of early  
17 embryogenesis in *Caenorhabditis elegans*. *Nature*, **434**, 462–469.
- 18 73. Simmer,F., Moorman,C., Van Der Linden,A.M., Kuijk,E., Van Den Berghe,P.V.E., Kamath,R.S.,  
19 Fraser,A.G., Ahringer,J. and Plasterk,R.H.A. (2003) Genome-wide RNAi of *C. elegans* using the  
20 hypersensitive *rrf-3* strain reveals novel gene functions. *PLoS Biol.*, **1**.
- 21 74. Lehrbach,N.J., Castro,C., Murfitt,K.J., Abreu-Goodger,C., Griffin,J.L. and Miska,E.A. (2012) Post-  
22 developmental microRNA expression is required for normal physiology, and regulates aging in  
23 parallel to insulin/IGF-1 signaling in *C. elegans*. *RNA*, **18**, 2220–2235.
- 24 75. Dexheimer,P.J., Wang,J. and Cochella,L. (2020) Two MicroRNAs Are Sufficient for Embryonic  
25 Patterning in *C. elegans*. *Curr. Biol.*, **30**.
- 26 76. Gantier,M.P., McCoy,C.E., Rusinova,I., Saulep,D., Wang,D., Xu,D., Irving,A.T., Behlke,M.A.,  
27 Hertzog,P.J., Mackay,F., *et al.* (2011) Analysis of microRNA turnover in mammalian cells  
28 following Dicer1 ablation. *Nucleic Acids Res.*, **39**, 5692–5703.
- 29 77. Alvarez-Saavedra,E. and Horvitz,H.R. (2010) Many families of *C. elegans* microRNAs are not  
30 essential for development or viability. *Curr. Biol.*, **20**, 367–373.
- 31 78. Ruby,J.G., Jan,C.H. and Bartel,D.P. (2007) Intronic microRNA precursors that bypass Drosha  
32 processing. *Nature*, **448**, 83–86.
- 33 79. Chung,W.-J., Agius,P., Westholm,J.O., Chen,M., Okamura,K., Robine,N., Leslie,C.S. and Lai,E.C.  
34 (2011) Computational and experimental identification of mirtrons in *Drosophila melanogaster* and  
35 *Caenorhabditis elegans*. *Genome Res.*, **21**, 286–300.

- 1 80. Westholm,J.O., Ladewig,E., Okamura,K., Nicolas,R. and Lai,E.C. (2012) Common and distinct  
2 patterns of terminal modifications to mirtrons and canonical microRNAs. *RNA*, **18**, 177–192.
- 3 81. Chatterjee,S., Fasler,M., Büssing,I. and Grosshans,H. (2011) Target-mediated protection of  
4 endogenous microRNAs in *C. elegans*. *Dev. Cell*, **20**, 388–96.
- 5 82. Ambros,V. (2011) MicroRNAs and developmental timing. *Curr. Opin. Genet. Dev.*, **21**, 511–7.
- 6 83. Miki,T.S., Rügger,S., Gaidatzis,D., Stadler,M.B. and Großhans,H. (2014) Engineering of a  
7 conditional allele reveals multiple roles of XRN2 in *Caenorhabditis elegans* development and  
8 substrate specificity in microRNA turnover. *Nucleic Acids Res.*, **42**, 4056–4067.

9

10

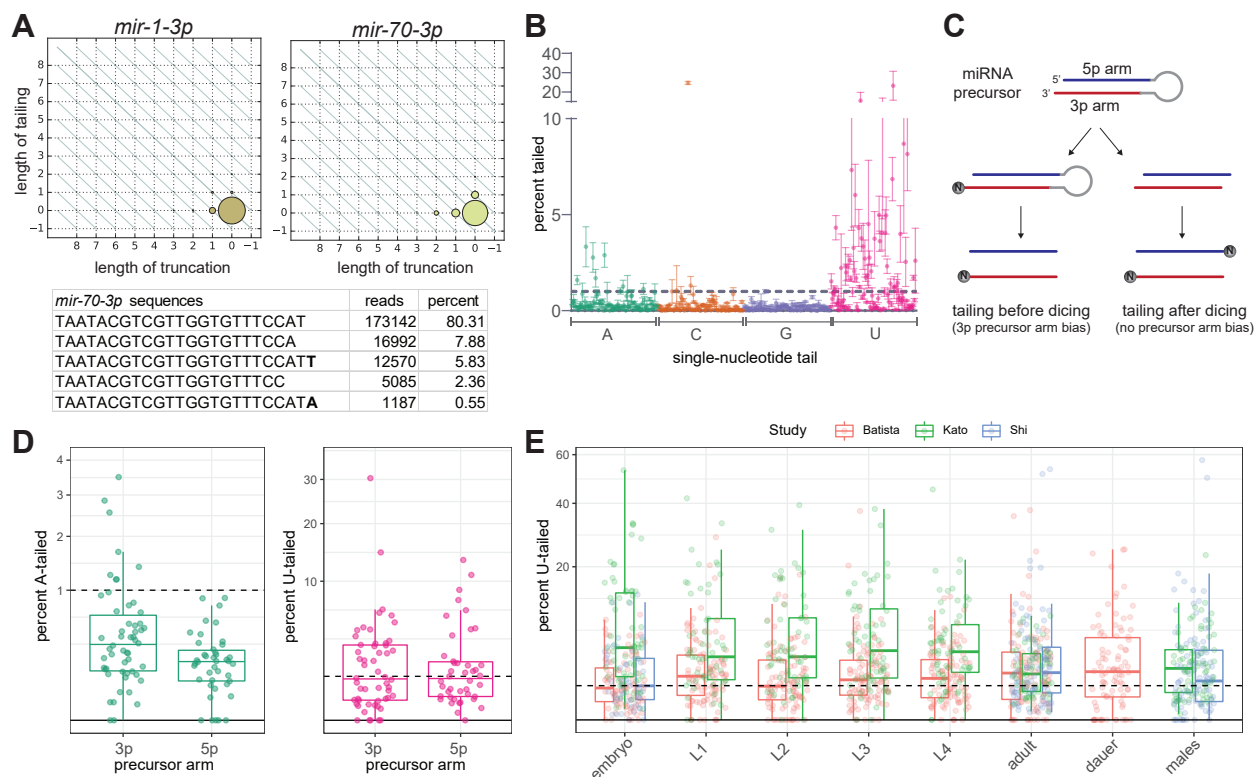

1 **Figure 1. Characterization of miRNA tailing in *C. elegans*.** (A) 2D matrix representing the truncation  
2 and tailing status of the indicated miRNAs. The sizes of the dots represent the proportion of reads, with the  
3 canonical sequence at zero on both axes, and increasingly trimmed or tailed species plotted to the left on  
4 the x-axis or upward on the y-axis, respectively. Bottom: Number of reads of most abundant *mir-70-3p*  
5 species in one wild type adult library, with the canonical sequence being the most abundant. (B) Mean and  
6 standard deviation of prevalence of single nucleotide 3' terminal additions of each indicated nucleotide from  
7 three biological replicates. (C) Schematic of miRNA tailing preceding or following Dicer-mediated  
8 cleavage of the miRNA precursor. (D) Comparison of prevalence of mono-adenylation and mono-  
9 uridylation on 3p- versus 5p-derived miRNAs. One biological replicate is shown. (E) Meta-analysis of three  
10 published datasets shows tailing across *C. elegans* developmental stages. Prevalence of mono-uridylation  
11 of miRNAs across development is shown. Only miRNAs with >50 RPM in the indicated library were  
12 analyzed. (B, D) Only miRNAs with > 50 RPM in all biological replicates were analyzed. (B, D-E) Each  
13 dot represents an individual miRNA.



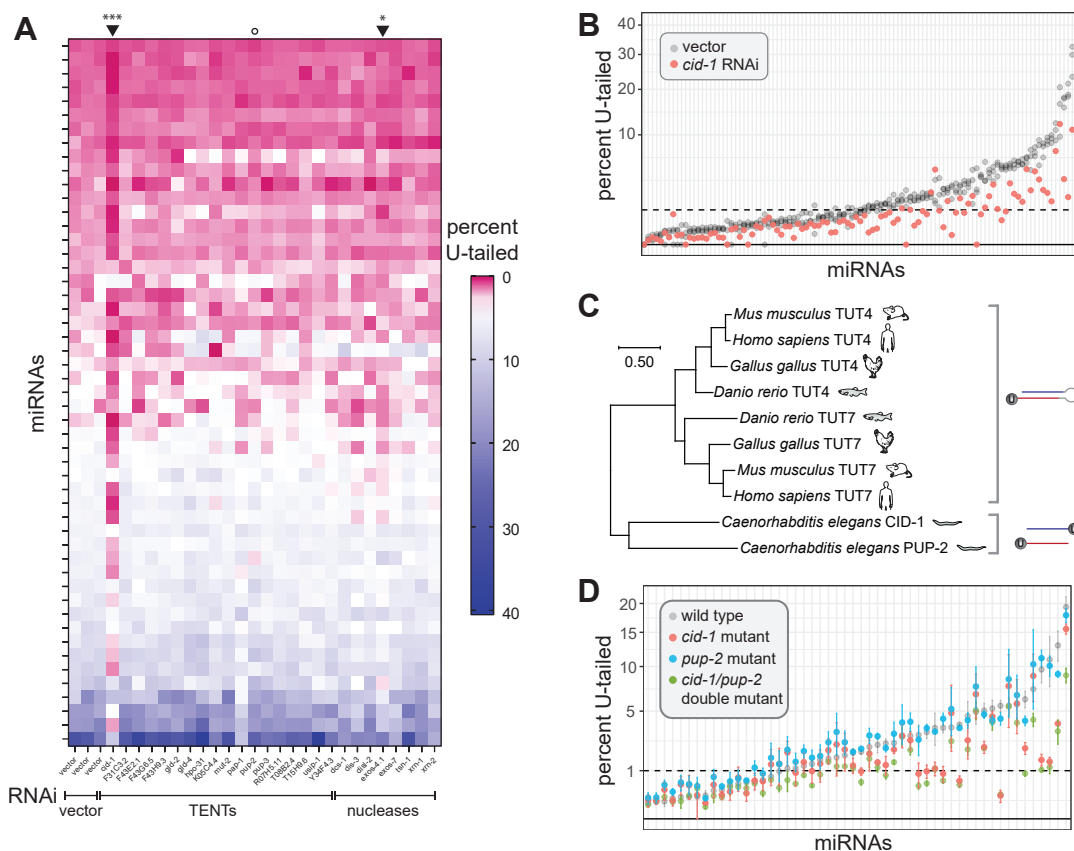

1 **Figure 2. miRNA uridylation requires CID-1.** (A) Heatmap summarizing percent of mono-uridylation  
2 across each miRNA (rows) in each RNAi condition (columns). All miRNAs with >50 RPM in all empty  
3 vector replicates and an average of >1% mono-uridylation across the three empty vector replicates are  
4 shown. Arrowhead above heatmap indicates column significantly different than vector (*cid-1* and *exos-4*  
5 RNAi). \*\*\**p*-value = 0.0003, \* *p*-value = 0.016. Open circle indicates *pup-2* RNAi, which does not have  
6 an effect. (B) Percent mono-uridylation in vector or *cid-1* RNAi. Each column is an individual miRNA. All  
7 miRNAs with >50 RPM in all empty vector replicates are shown. Three biological replicates of empty  
8 vector are shown in gray. (C) Phylogenetic relationship of CID-1, PUP-2, TUT4, and TUT7. (Note the  
9 following alternative names for these genes CID-1/CDE-1/PUP-1, PUP-2,  
10 TUT4/TENT3A/ZCCHC11/PAPD3, and TUT7/TENT3B/ZCCHC6/PAPD6.) (D) Percent mono-  
11 uridylation in indicated genotype. All miRNAs with >50 RPM in all wild type replicates are shown. Mean  
12 and standard error are shown for three biological replicates per genotype.

13

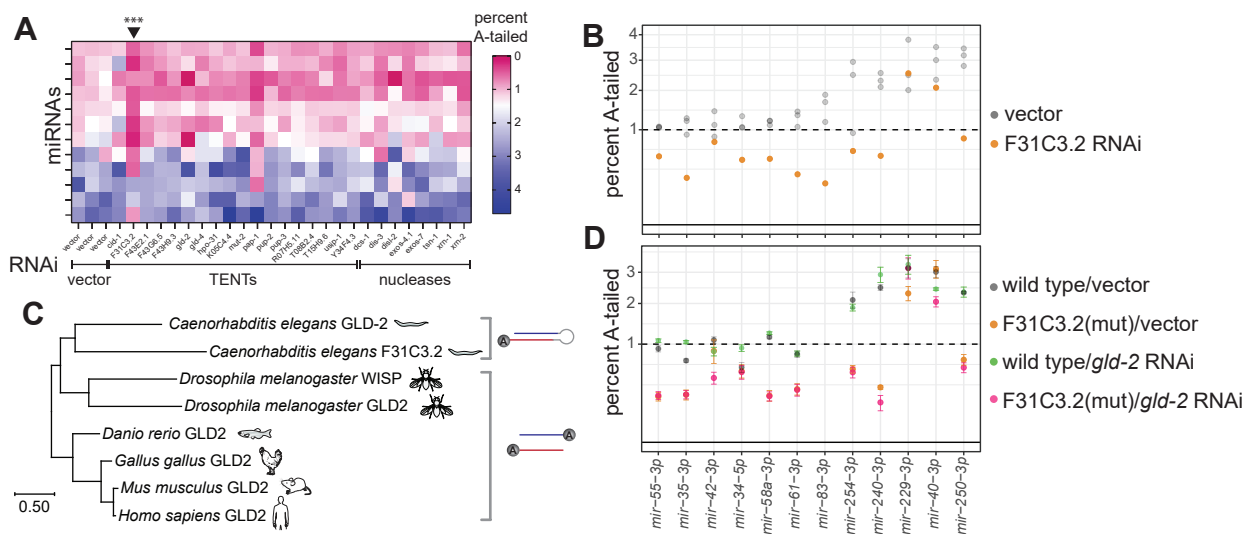

1 **Figure 3. miRNA adenylation requires F31C3.2/GLDR-2.** (A) Heatmap summarizing percent of mono-  
2 adenylation across each miRNA (rows) in each RNAi condition (columns). Arrowheads above heatmap  
3 indicate columns significantly different from vector, corresponding to F31C3.2 RNAi, which reduces  
4 adenylation. \*\*\* $p$ -value = 0.0003 (B) Percent mono-adenylation in vector or F31C3.2/GLDR-2 RNAi.  
5 Three biological replicates of empty vector are shown in gray. (A-B) All miRNAs with >50 RPM in all  
6 empty vector replicates and an average of >1% mono-adenylation across the three empty vector replicates  
7 are shown. (C) Phylogenetic tree of F31C3.2/GLDR-2, GLD-2, and WISP. (Note that GLD2 in humans is  
8 also known as TENT2/TUT2/PAPD4/APD4.) (D) Percent mono-adenylation in indicated genotypes/RNAi.  
9 Mean and standard error for four biological replicates are shown. MiRNAs shown are the same as those in  
10 (A-B).

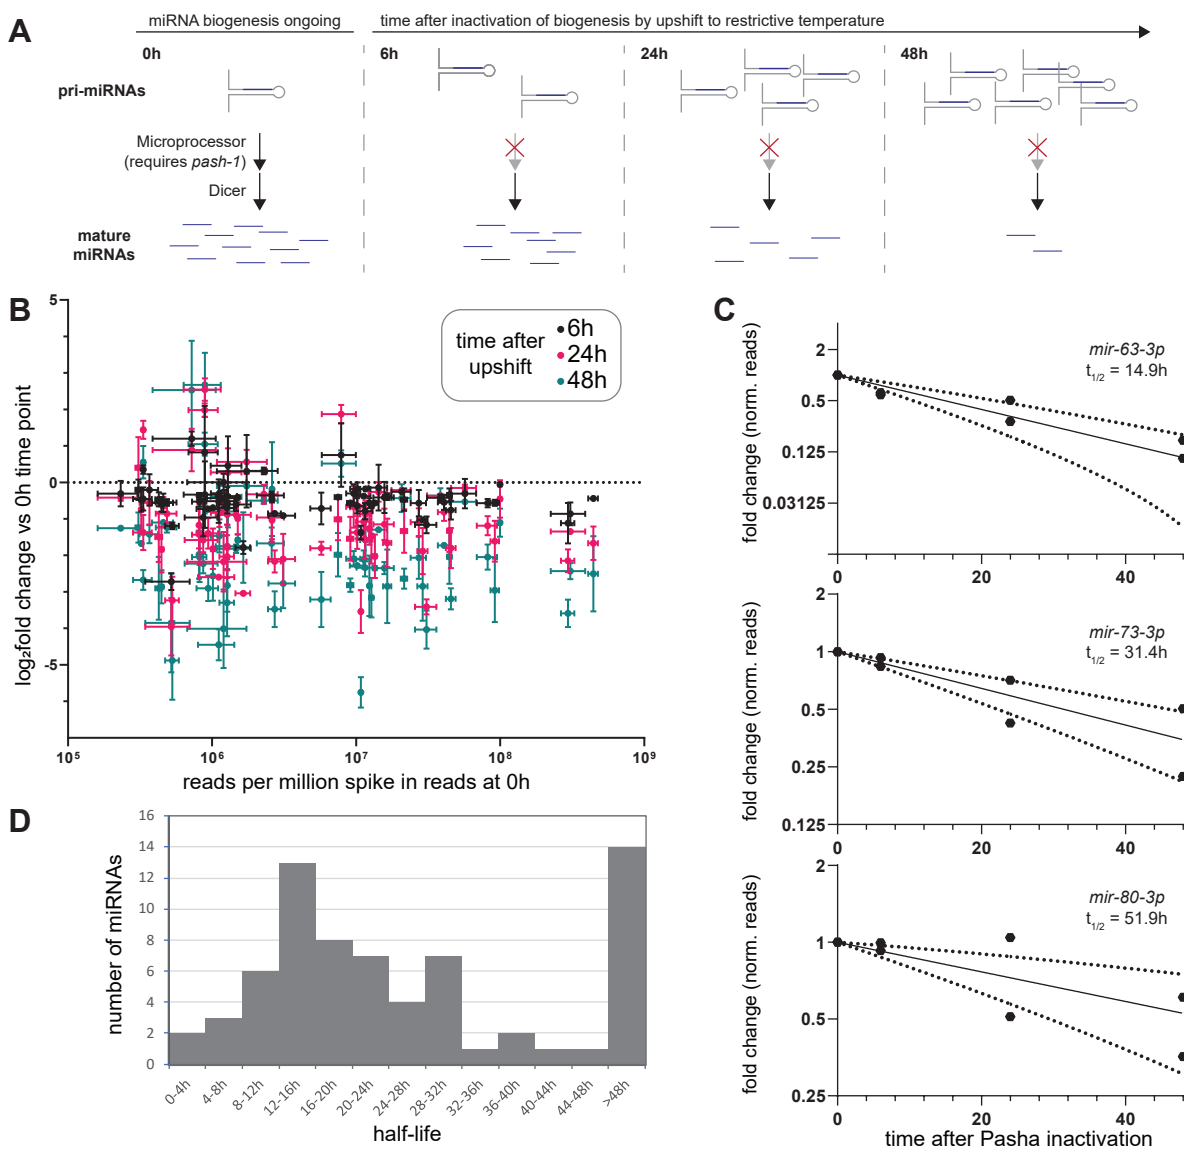

1 **Figure 4. Characterization of miRNA half-lives in *C. elegans*.** (A) Schematic of time courses after *pash-*  
2 *1* inactivation used for measuring miRNA decay. (B) Log<sub>2</sub> fold change of miRNA reads compared to 0h  
3 after PASH-1 inactivation (y-axis) versus abundance at 0h (x-axis). Reads were normalized to spike-ins.  
4 Mean and standard error of two biological replicates are shown. (C) Representative time course data plotted  
5 as fold change, with exponential decay model and 95% prediction bands (dashed lines). Data for two  
6 biological replicates is shown. (D) Distribution of miRNA half-lives modeled from *pash-1(ts)* time course  
7 data. (B-D) Only miRNAs with >50 RPM in both replicates at the 0h timepoint were included in the  
8 analysis.

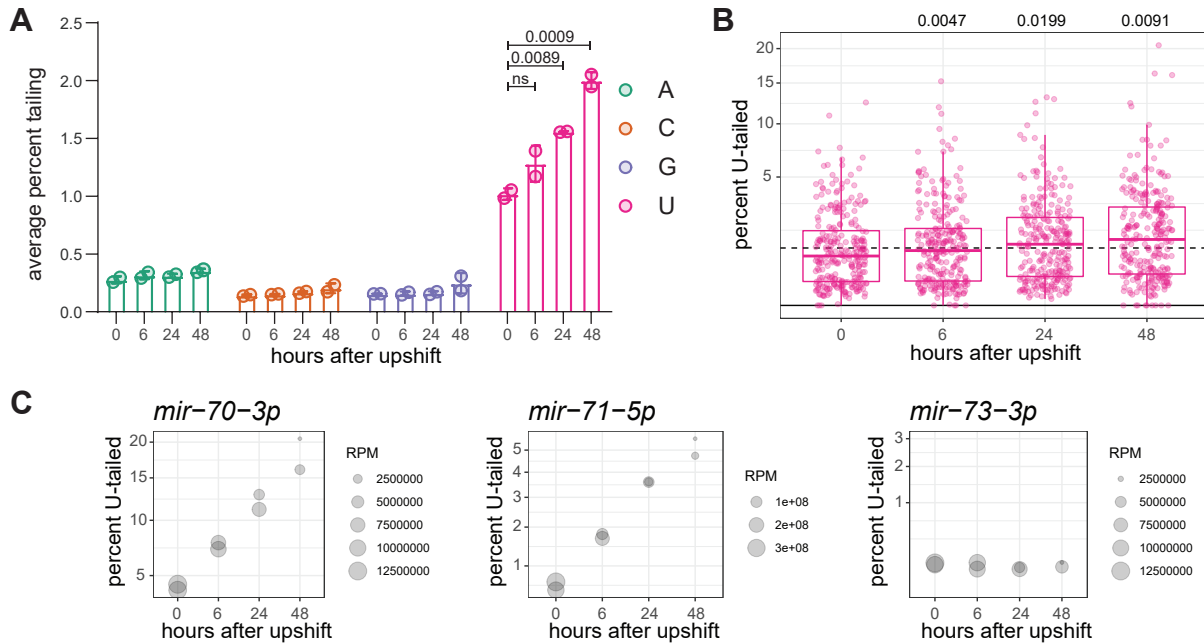

1 **Figure 5. The proportion of tailed and trimmed miRNAs increases over time after biogenesis. (A)**  
 2 Average percent of reads bearing each indicated single-nucleotide tail. (B) Prevalence of mono-uridylation  
 3 of miRNAs across time course after PASH-1 inactivation in one biological replicate. Each dot represents  
 4 an individual miRNA. (A-B) One-way ANOVA was used to compare all time points to 0h; when ANOVA  
 5 was significant, Dunnett's multiple comparison test was performed, and *p*-values are shown above graph.  
 6 (C) Representative plots for indicated miRNAs, where y-axis indicates percent mono-uridylation, and size  
 7 of dot represents read number. Note that reads here are reads per million spike-in reads, an arbitrary unit.

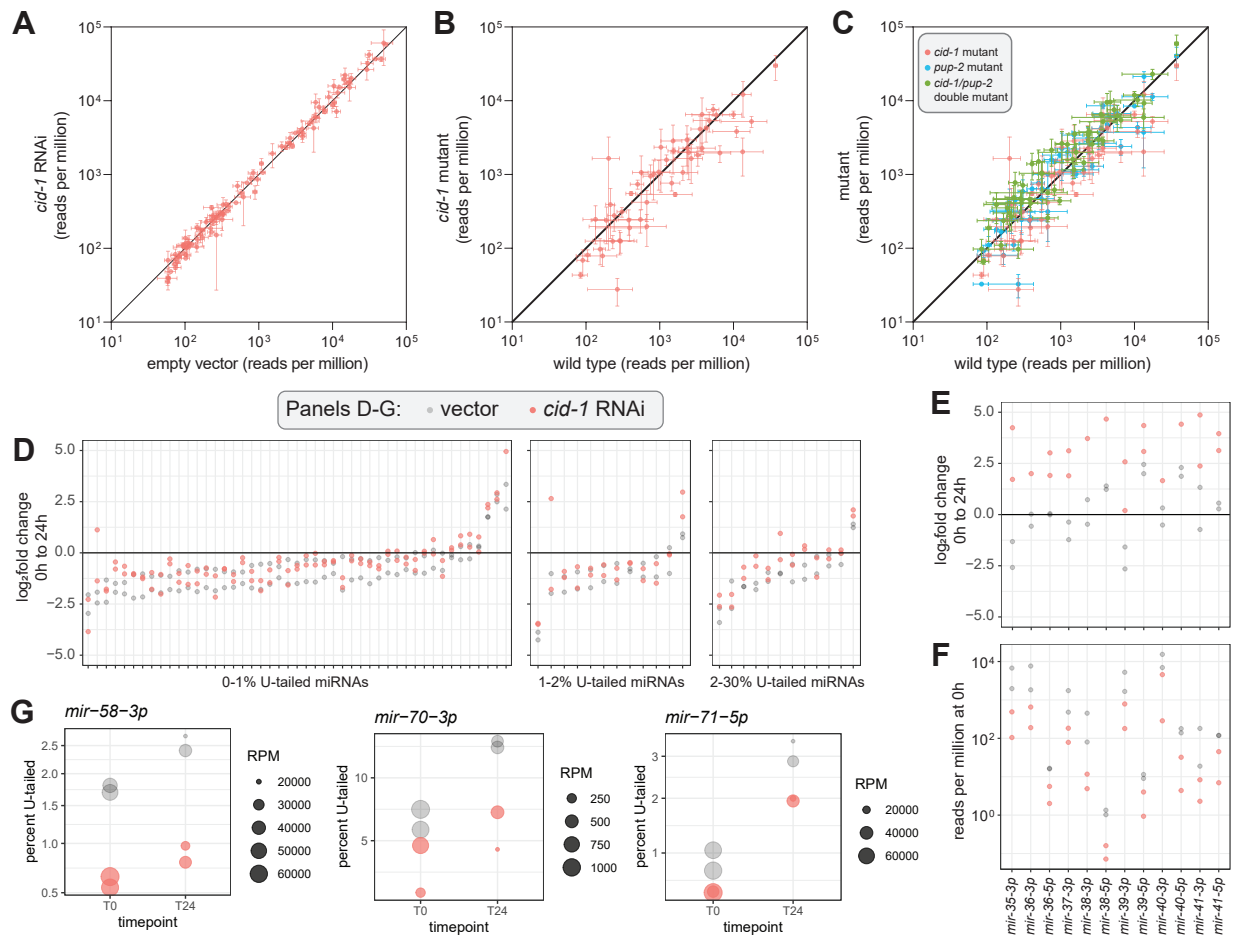

1 **Figure 6. Uridylation does not globally regulate miRNA abundance or decay.** (A) Abundance of  
2 miRNAs in *cid-1* RNAi versus empty vector. Mean and standard error are plotted. (B-C) Abundance of  
3 miRNAs in indicated mutant versus wild type. (A-C) Except for *cid-1* RNAi (two biological replicates),  
4 mean and standard error of three biological replicates are plotted. All miRNAs >50 RPM in all empty vector  
5 or wild type replicates, respectively, are shown. (D) Log<sub>2</sub>fold change in reads per million from zero to 24h  
6 after PASH-1 inactivation. miRNAs are divided into three plots by the average percent mono-uridylation  
7 in empty vector at 0h. All miRNAs with >50 RPM at 0h in both empty vector replicates is shown, except  
8 for *mir-35-41*. (E) Log<sub>2</sub>fold change from zero to 24h after PASH-1 inactivation for *mir-35-41* guide (3p)  
9 strands and star (5p) strands. All miRNAs from this group are shown, regardless of abundance, except for  
10 *mir-35-5p* and *mir-37-5p* which had ~0 reads in all samples. (F) Abundance of *mir-35-41* guide and star  
11 strands at 0h (prior to PASH-1 inactivation). (G) Plots showing percent mono-uridylation and miRNA  
12 abundance at zero and 24h after PASH-1 inactivation. Size of dot represents abundance, and y-axis is  
13 percent mono-uridylation.
